# Supplementary material for: Stromal cell-derived factor 1 regulates in vitro sperm migration towards the cumulus-oocyte complex in cattle
Source: PubMed Central journal article supplement (PMC7192438; doi:10.1371/journal.pone.0232536), 2020-04-30
Supplement: pone.0232536.s011.pdf [file pone.0232536.s011.pdf]

## Supporting Information

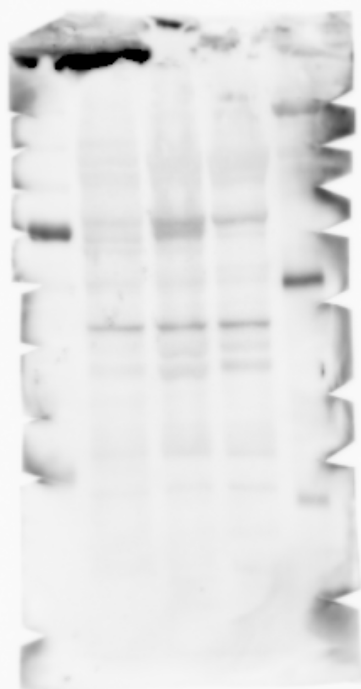

**S1 raw images for Fig. 2C.**
